# Supplementary material
Source: Springer Nature journal article supplement (https://www.springermedizin.de/resource/supplementary/13063_2012_1180_MOESM1_ESM.pdf/9619542)

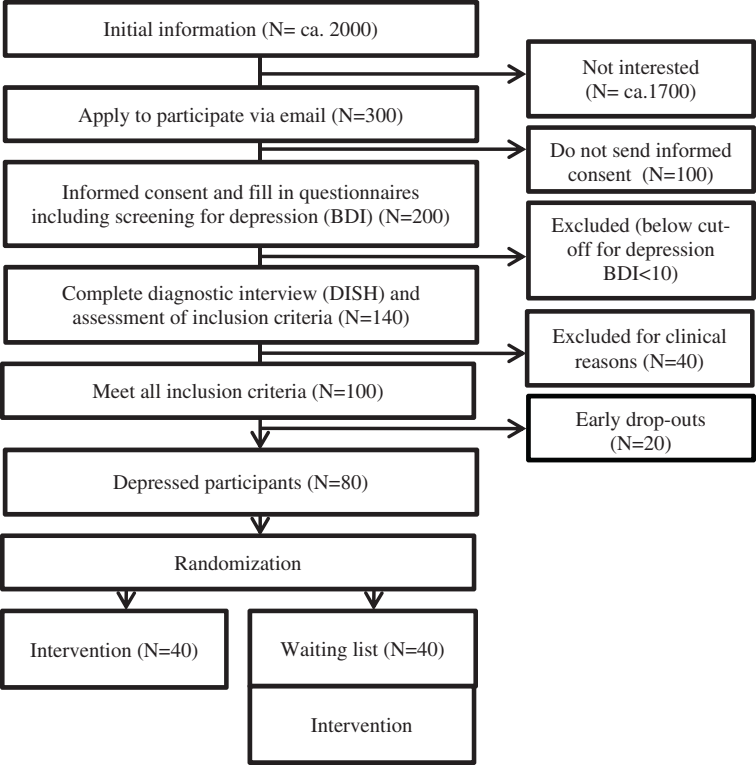

Supplement: MOESM1 [file 9619542]
